# Supplementary material
Source: publisher figshare collection journal article supplement (https://wiley.figshare.com/articles/dataset/_/3549900)
Supplement: Supplementary file 1 [file 1]

**R. Guimerà, D. B. Stouffer, M. Sales-Pardo, E. A. Leicht, M. E. J. Newman, and L. A. N. Amaral. 2010. Origin of compartmentalization in food webs. *Ecology* 91:2941–2951.**

# Origin of compartmentalization in food webs

(Digital Appendices)

R. Guimerà, D. B. Stouffer, M. Sales-Pardo, E. A. Leicht,  
M. E. J. Newman, and L. A. N. Amaral

## A Homogeneity calculations

### A.1 Niche homogeneity

Recall from the manuscript that we define the niche homogeneity  $H_n$  as

$$H_n = \frac{\langle B \rangle - B^*}{\sigma_B}, \quad (\text{A.1})$$

where  $B^*$  is the number of boundaries, in the niche space, between the observed compartments,  $\langle B \rangle$  is the average number of boundaries between compartments for the ensemble of all partitions of the species (with the same number of compartments and the same compartment sizes as the observed partitions), and  $\sigma_B$  is the standard deviation of the same quantity (Fig. A1).

For a given partition of a network with  $N_C$  compartments of sizes  $\{n_1, n_2, \dots, n_{N_C}\}$ , both  $\langle B \rangle$  and  $\sigma_B$  can be calculated analytically by realizing that averaging over partitions is equivalent to averaging over random re-orderings of the species in the niche space (and keeping each species' actual compartment).

Let  $m_j$  be the compartment of species  $j$ , and  $\mathcal{O}_i$  the species in position  $i$  in a given ordering  $\mathcal{O}$  of the species, so that  $m_{\mathcal{O}_i}$  is the compartment of the species in position  $i$ . Then, the number of boundaries between compartments for ordering  $\mathcal{O}$  is  $\sum_{i=1}^{S-1} (1 - \delta(m_{\mathcal{O}_i}, m_{\mathcal{O}_{i+1}}))$ , where  $S$  is the total number of species, and the average is

$$\langle B \rangle = \frac{1}{S!} \sum_{\{\mathcal{O}\}} \sum_{i=1}^{S-1} (1 - \delta(m_{\mathcal{O}_i}, m_{\mathcal{O}_{i+1}})) , \quad (\text{A.2})$$

where the first sum is over all possible orderings of the species. Similarly,  $\sigma_B$  can be calculated as

$$\sigma_B = \left( \langle B^2 \rangle - \langle B \rangle^2 \right)^{1/2}, \quad (\text{A.3})$$

with

$$\langle B^2 \rangle = \frac{1}{S!} \sum_{\{\mathcal{O}\}} \left[ \sum_{i=1}^{S-1} (1 - \delta(m_{\mathcal{O}_i}, m_{\mathcal{O}_{i+1}})) \right]^2. \quad (\text{A.4})$$

After some algebra, we obtain

$$\langle B \rangle = S - \frac{1}{S} \sum_{m=1}^{N_C} s_m^2 \quad (\text{A.5})$$

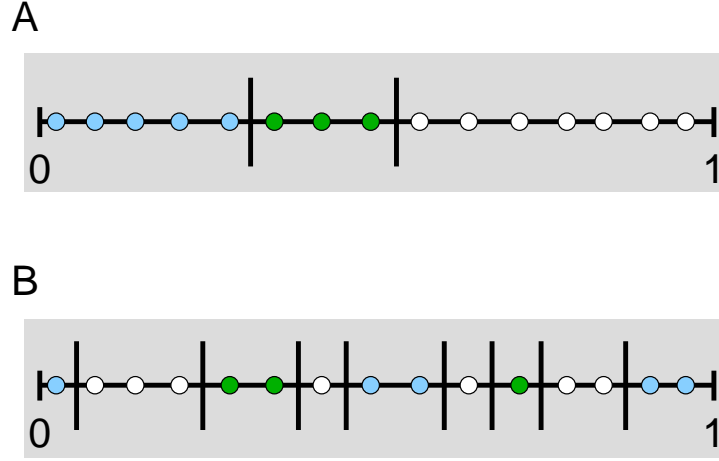

Figure A1: Boundaries in niche space between hypothetical compartments. The horizontal axis represents the niche space and each circle represents a species, with colors indicating compartments. Boundaries are indicated with vertical lines. A, For very niche-homogeneous compartments, all species in a compartment occupy contiguous positions in the niche space, so the number of “boundaries” between compartments (a boundary separates each pair of contiguous species with different color) is low. When compartments are perfectly homogeneous, the number of boundaries is simply the number of compartments minus 1. B, For less homogeneous compartments, the number of boundaries is larger.

$$\sigma_B = \left\{ \frac{1}{S(S-1)} \left[ (S+1) \sum_{m=1}^{N_C} s_m^2 - 2 \sum_{m=1}^{N_C} s_m^3 + \frac{1}{S} \left( \sum_{m=1}^{N_C} s_m^2 \right)^2 - S^2 \right] \right\}^{1/2}. \quad (\text{A.6})$$

where  $s_m$  is the number of species in compartment  $m$ , and  $N_c$  is the number of compartments.

## A.2 Trophic homogeneity

Again, recall from the manuscript that we define trophic homogeneity  $H_t$  in the same way as niche homogeneity, but counting the boundaries in the trophic space, rather than the niche space. The trophic level  $l_i$  of species  $i$  is (Levine, 1980)

$$l_i = 1 + \sum_{j \in P_i} \frac{l_j}{k_i^{\text{in}}}, \quad (\text{A.7})$$

where  $P_i$  is the set of  $i$ 's prey, and  $k_i^{\text{in}}$  is the number of prey (Levine, 1980).

This definition of trophic level raises an important issue about the structure of model food webs. In principle, nothing precludes the generalized niche model (or the niche model) from generating food webs that are “trophically inconsistent.” For example, a species could have no other prey than itself, so that Eq. A.7 does not have a solution. Since these inconsistencies are not observed in real food webs, we discard all trophically inconsistent model food webs for all the calculations reported in the manuscript.

### A.3 Sink homogeneity

For each species  $i$  in a food web, we find the set  $T_i$  of species that belong to  $i$ 's sink food web, that is, the species on which  $i$  preys directly and indirectly ( $i$ 's prey, the prey of  $i$ 's prey, the prey of the prey of  $i$ 's prey, and so on). For convenience, we always exclude  $i$  from  $T_i$ .

We then count the number  $o_i^*$  of species that belong to both  $T_i$  and species  $i$ 's compartment  $C_i$ . We define sink homogeneity as

$$H_s = \sum_{i=1}^S \frac{o_i^* - \langle o_i \rangle}{\sigma_{o_i}}, \quad (\text{A.8})$$

where the sum is over all species, and  $\langle o_i \rangle$  and  $\sigma_{o_i}$  are the average and standard deviation, respectively, of the null expectation for the overlap between  $T_i$  and  $C_i$ .

The simplest null model is one in which nodes in  $T_i$  are randomly selected from the actual compartments. Let us call  $t_i$  the number of nodes in  $T_i$  and  $s_i$  the number of nodes in  $C_i$ . In the null model, the probability  $p_i(k)$  that  $T_i$  contains exactly  $k$  nodes from  $C_i$  is

$$p_i(k) = \frac{\binom{s_i-1}{k} \binom{S-s_i}{t_i-k}}{\binom{S-1}{t_i}} \quad k \leq s_i - 1, k \leq t_i. \quad (\text{A.9})$$

The denominator is the total number of ways in which one can pick  $t_i$  elements among a set of  $S - 1$  (all the nodes in the network except  $i$ ). The numerator is the number of ways in which those elements can be selected so that exactly  $k$  of them come from compartment  $C_i$ ; that is, the number of ways one can select  $k$  elements among the  $s_i - 1$  in  $C_i$  (excluding  $i$ ), times the number of ways one can select the remaining  $t_i - k$  among the  $S - s_i$  nodes in compartments other than  $C_i$ .

With this, one can calculate the expected overlap  $\langle o_i \rangle$  between  $T_i$  and  $M_i$ , as well as the standard deviation  $\sigma_{o_i}$

$$\langle o_i \rangle = \sum_k k p_i(k) = t_i \frac{s_i - 1}{S - 1} \quad (\text{A.10})$$

$$\langle o_i^2 \rangle = \sum_k k^2 p_i(k) \quad (\text{A.11})$$

$$\begin{aligned} &= t_i(s_i - 1) \frac{(S - s_i)!(S - t_i - 1)!}{(S - 1)!(S - t_i - s_i + 1)!} {}_3F_2(2, 2 - s_i, 1 - t_i; 1, S - t_i - s_i + 2; 1) \\ \sigma_{o_i} &= \sqrt{\langle o_i^2 \rangle - \langle o_i \rangle^2} \end{aligned} \quad (\text{A.12})$$

where  ${}_3F_2(a_1, a_2, a_3; b_1, b_2; z)$  is the generalized hypergeometric function (Weisstein, 2008).

## References

- Levine, S. 1980. Several measures of trophic structure applicable to complex food webs. *J. Theor. Biol.* **83**:195–207.
- Weisstein, E. W., 2008. Regularized Hypergeometric Function. From MathWorld—A Wolfram Web Resource. URL <http://mathworld.wolfram.com/RegularizedHypergeometricFunction.html>.
